# Supplementary material for: AR-A014418 regulates intronic polyadenylation and transcription of PD-L1 through inhibiting CDK12 and CDK13 in tumor cells
Source: HighWire-hosted journal article supplement (doi:10.1136/jitc-2022-006483), 2023-05-01
Supplement: jitc-2022-006483supp001_data_supplement.pdf [file jitc-2022-006483supp001_data_supplement.pdf]

AR-A014418 regulates intronic polyadenylation and transcription of PD-L1 through inhibiting CDK12 and CDK13 in tumor cells

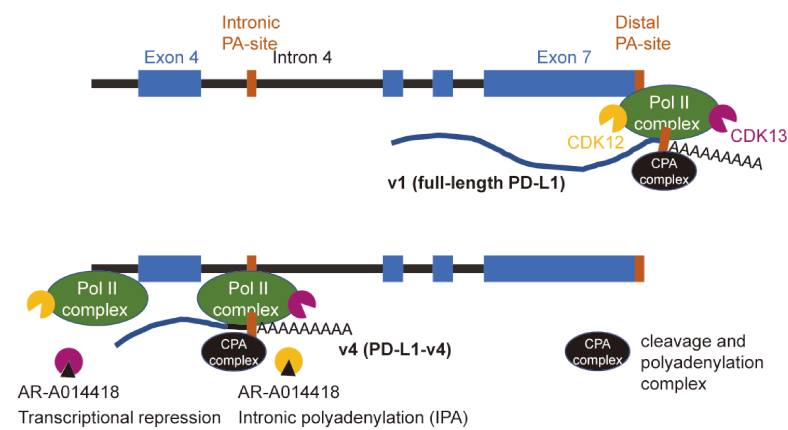

Authors

Ganggang Zhang, Bin Lan, Xin Zhang, Mengyao Lin, Yi Liu, Junsong Chen, Fang Guo

Correspondence

fguo@sjtu.edu.cn

In Brief

AR-A014418 inhibits CDK12 to enhance the IPA, and inhibits CDK13 to repress the transcription of PD-L1. The superposition of enhancing IPA and repressing transcription dramatically suppresses full-length PD-L1 induction by IFN- $\gamma$ .
